# Supplementary material
Source: PubMed Central journal article supplement (PMC6663869)
Supplement: supp_RA119.009037_145116_2_supp_336206_prxrbg.pdf [file supp_RA119.009037_145116_2_supp_336206_prxrbg.pdf]

| Genomic Coordinates                      | Locus Type | Nearest Gene Name   | # of Mismatches | Target Sequence at Locus (mismatches in red) | Result of Off-Target Analysis                                                                                 |
|------------------------------------------|------------|---------------------|-----------------|----------------------------------------------|---------------------------------------------------------------------------------------------------------------|
| <a href="#">chrX:74283651-74283673</a>   | Exon       | <i>Taz</i>          | 0               | TCCTAAAACTCCGCCACATC                         | Two deviant alleles detected in TAZ-KO; 81 bp deletion and single-base deletion near end of <i>Taz</i> exon 3 |
| <a href="#">chr5:116193392-116193414</a> | Intron     | <i>Ccdc60</i>       | 4               | TGCTTCAGCTCCGCCACATC                         | No differences detected between WT and TAZ-KO                                                                 |
| <a href="#">chrX:99228578-99228600</a>   | Intergenic | <i>Efnb1</i>        | 4               | TCCTTTTCCTCCGCCACATC                         | No differences detected between WT and TAZ-KO                                                                 |
| <a href="#">chr7:17982183-17982205</a>   | Intergenic | <i>Ceacam11</i>     | 4               | ACCCAAACCTCAGCCACATC                         | No differences detected between WT and TAZ-KO                                                                 |
| <a href="#">chr4:141881515-141881537</a> | Intergenic | <i>Fhad1os2</i>     | 4               | TTCTCAACCTCTGCCACATC                         | No differences detected between WT and TAZ-KO                                                                 |
| <a href="#">chr13:40369162-40369184</a>  | Intergenic | <i>Ofcc1</i>        | 4               | GGCTATAACTCCGGCACATC                         | No differences detected between WT and TAZ-KO                                                                 |
| <a href="#">chr15:79038802-79038824</a>  | Intron     | <i>Gcat</i>         | 4               | TCCTTATACCCTGCCACATC                         | No differences detected between WT and TAZ-KO                                                                 |
| <a href="#">chr16:57507735-57507757</a>  | Intron     | <i>Filip1l</i>      | 4               | TTCTAAATGTCCACCACATC                         | No differences detected between WT and TAZ-KO                                                                 |
| <a href="#">chr5:24422964-24422986</a>   | Intron     | <i>Cdk5</i>         | 4               | TCACAAAACACTCCACATC                          | No differences detected between WT and TAZ-KO                                                                 |
| <a href="#">chr2:31561027-31561049</a>   | Intergenic | <i>Gm13426</i>      | 4               | TCCCAAAGATCCTCCACATC                         | No differences detected between WT and TAZ-KO                                                                 |
| <a href="#">chr6:89519351-89519373</a>   | Intron     | <i>RP24-69A18.1</i> | 4               | TCCTGTAACCTGCACCACATC                        | No differences detected between WT and TAZ-KO                                                                 |

**Supplementary Table 1. Off-target CRISPR/Cas9 effects were not detected in TAZ-KO cells.** The top ten predicted off-target sites were identified using the CCTop-CRISPR/Cas9 target predictor tool based on the *Mus musculus* GRCm38 reference genome and the gRNA sequence utilized to create the TAZ-KO cell line (46,65). None of the predicted sites were located in an exonic region of the genome, and all off-target sites contained at least four mismatched bases relative to the gRNA sequence. To determine whether any of these sites were altered by Cas9 in the TAZ-KO line, whole-genome sequencing was performed on wild type (WT) and TAZ-KO cells, and differential variant analysis was run to identify deviations between the WT and TAZ-KO genomes. This analysis indicated that none of the predicted off-target sites differed between the two genomes, and also confirmed the presence of two deviant alleles at the primary gRNA target of tafazzin exon 3 (46).
